# Supplementary material
Source: Springer Nature journal article supplement (https://www.springermedizin.de/resource/supplementary/12905_2011_266_MOESM2_ESM.pdf/9518320)
Supplement: MOESM2 [file 9518320]

**Table 2.** Association between women’s attitudes towards marital norms, justifications for a man to hit his wife and women’s right to refuse sex and physical or sexual violence (OR, 95% CI)

| ATTITUDES                                                   | All women<br>n=765 | Physical violence |             | Sexual violence |              |
|-------------------------------------------------------------|--------------------|-------------------|-------------|-----------------|--------------|
|                                                             |                    | OR                | CI 95%      | OR              | CI 95%       |
| <b>GENDER ROLES</b>                                         |                    |                   |             |                 |              |
| <b>Good wife obeys husband</b>                              |                    |                   |             |                 |              |
| Disagree                                                    | 42%                | 1                 |             | 1               |              |
| Agree                                                       | 58%                | 0.71              | 0.45 – 1.12 | 1.44*           | 1.01 – 2.06  |
| <b>Family problems should not be discussed outside</b>      |                    |                   |             |                 |              |
| Disagree                                                    | 6%                 | 1                 |             | 1               |              |
| Agree                                                       | 94%                | 0.56              | 0.24 – 1.32 | 0.82            | 0.39 – 1.71  |
| <b>A man should show who is the boss</b>                    |                    |                   |             |                 |              |
| Disagree                                                    | 17%                | 1                 |             | 1               |              |
| Agree                                                       | 83%                | 1.31              | 0.67 – 2.55 | 1.89*           | 1.09 – 3.26  |
| <b>A wife is obliged to have sex with her husband</b>       |                    |                   |             |                 |              |
| Disagree                                                    | 19%                | 1                 |             | 1               |              |
| Agree                                                       | 81%                | 0.48*             | 0.29 – 0.80 | 0.82            | 0.53 – 1.26  |
| <b>Woman should be able to choose own friends</b>           |                    |                   |             |                 |              |
| Agree                                                       | 58%                | 1                 |             | 1               |              |
| Disagree                                                    | 42%                | 1.32              | 0.83 – 2.08 | 0.99            | 0.69 – 1.41  |
| <b>Others outside family should intervene</b>               |                    |                   |             |                 |              |
| Agree                                                       | 66%                | 1                 |             | 1               |              |
| Disagree                                                    | 34%                | 0.58*             | 0.34 – 0.99 | 0.76            | 0.52 – 1.11  |
| <b>JUSTIFICATION TO HIT</b>                                 |                    |                   |             |                 |              |
| Hitting wife is never justified                             | 42%                | 1                 |             | 1               |              |
| Hitting wife is justified for one reason only               | 39%                | 1.47              | 0.88 – 2.45 | 1.19            | 0.79 – 1.764 |
| Hitting wife is justified for two or more reasons           | 16%                | 1.69              | 0.89 – 3.20 | 2.09*           | 1.30 – 3.38  |
| <b>JUSTIFICATION TO REFUSE SEX</b>                          |                    |                   |             |                 |              |
| to refuse sex is justified for all four reasons             | 59%                | 1                 |             | 1               |              |
| to refuse sex is justified for up to 3 reasons              | 31%                | 0.81              | 0.47 – 1.41 | 0.76            | 0.47 – 1.07  |
| to refuse sex is justified for 1 reason or no reason at all | 8%                 | 2.98*             | 1.54 – 5.77 | 0.74            | 0.37 – 1.47  |
